# Supplementary material for: Electrical transport properties of [(1 − x )succinonitrile: x poly(ethylene oxide)]–LiCF 3 SO 3 –Co[tris-(2,2′-bipyridine)] 3 (TFSI) 2 –Co[tris-(2,2′-bipyridine)] 3 (TFSI) 3 solid redox mediators
Source: Royal Society of Chemistry journal article supplement (doi:10.1039/d3ra07314a), 2024-01-01
Supplement: d3ra07314a1.pdf [file d3ra07314a1.pdf]

## Electrical Transport Properties of [(1-x)Succinonitrile: xPoly(Ethylene Oxide)]- LiCF<sub>3</sub>SO<sub>3</sub>- Co[tris-(2,2'-bipyridine)]<sub>3</sub>(TFSI)<sub>2</sub>- Co[tris-(2,2'-bipyridine)]<sub>3</sub>(TFSI)<sub>3</sub> Solid Redox Mediators

Ravindra Kumar Gupta,\* Hamid Shaikh, Ahamad Imran, Idriss Bedja, Abrar Fahad Ajaj, Abdullah Saleh Aldwayyan, Aslam Khan, and Rashid Ayub

\* rgupta@ksu.edu.sa

### Supplementary Information

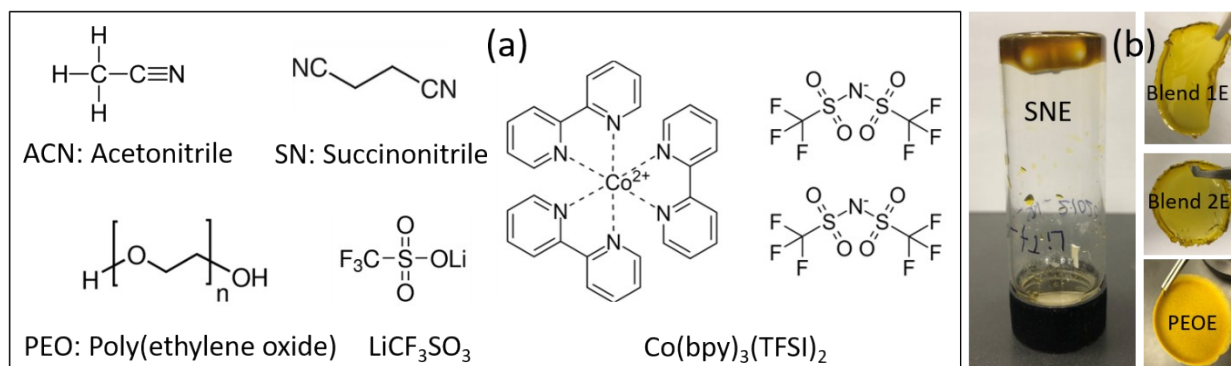

**Figure S1.** (a) Chemical structure of ingredients and (b) optical image of solid redox mediators.

**Table S1.** Observed vibrational frequencies (in  $\text{cm}^{-1}$ ) of liquid and solid redox mediators: ACNE, SNE, Blend 1E, Blend 2E, and PEOE. This also included vibrational frequencies of the solvent, matrix, and ionic salts.

| ACN <sup>®</sup> | ACNE   | SN    | SNE    | PEO    | PEOE   | Blend  | Blend 1E | Blend 2E | Li salt | Co salt | Assignment <sup>‡</sup>                                        |
|------------------|--------|-------|--------|--------|--------|--------|----------|----------|---------|---------|----------------------------------------------------------------|
|                  |        | 481s  | 481m   |        |        |        | 479w     | 479w     |         |         | $\delta_{\text{CCC}}$                                          |
|                  | 514m   |       | 514m   |        | 514m   |        | 514m     | 514m     | 521     | 514m    | $\delta_{\text{a,SO}_3}$                                       |
|                  | 571m   |       | 571m   |        | 570m   |        | 571m     | 571m     | 576     | 571s    | $\delta_{\text{a,SO}_3}$                                       |
|                  | 602sh  | 604s  | 603m   |        | 601m   | 604m   | 602m     | 603m     | 588     | 601m    | $\delta_{\text{CCC}}, \nu_{\text{a,CF}_3}$                     |
|                  | 616s   |       | 618s   |        | 617m   |        | 618m     | 618m     |         | 616m    | o.p.ring                                                       |
|                  | 653m   |       | 653m   |        | 651w   |        | 652w     | 652w     | 641     | 656m    | $\delta_{\text{a,SO}_3}$                                       |
| 753m             | 738m   |       | 738m   |        | 737m   |        | 738w     | 738w     |         | 740m    | $\nu_{\text{a,C-CN}}, \nu_{\text{s,SNS}}$                      |
|                  | 766s   | 762s  | 769s   |        | 777m   | 762m   | 777m     | 778m     | 766     | 767s    | $\delta_{\text{CH}_2}, \text{ring}, \delta_{\text{s,CF}_3}$    |
|                  | 789m   |       | 789m   |        |        |        | 786sh    | 786sh    |         | 789m    | $\nu_{\text{a,SNS}}$                                           |
|                  |        | 819s  | 818m   |        |        | 819w   |          |          |         |         | $\nu_{\text{C-CN}}$                                            |
|                  |        |       |        | 843s   | 842m   | 846m   | 848m     | 848m     |         |         | $\rho_{\text{a,CH}_2}, \nu_{\text{CO}}$                        |
| 919s             | 918m   | 918s  | 918m   |        |        | 918sh  | sh       | sh       |         |         | $\nu_{\text{s,C-CN}}$                                          |
|                  |        | 963s  | 963s   | 963s   | 964s   | 953s   | 954m     | 954s     |         |         | $\rho_{\text{a,CH}_2}, t_{\text{CH}_2}, \nu_{\text{C-CN}}$     |
|                  |        | 1002s | 1002m  |        |        | 1002m  | 1002w    | 1002w    |         |         | $\rho_{\text{CH}_2}$                                           |
| 1039s            | 1039sh |       |        |        |        |        |          |          | 1032    |         | $\rho_{\text{a,CH}_3}, \nu_{\text{s,SO}_3}$                    |
|                  | 1059s  |       | 1059s  | 1061m  | 1061sh | sh     | 1061sh   | 1061sh   |         | 1057s   | $\nu_{\text{a,COC}}, \rho_{\text{a,CH}_2}, \nu_{\text{a,SNS}}$ |
|                  |        |       |        | 1109s  | 1115s  | 1105s  | 1106s    | 1106s    |         |         | $\nu_{\text{s,COC}}$                                           |
|                  | 1137m  |       | 1136s  | 1149s  | 1144sh |        | 1135sh   | 1134sh   | 1156    | 1133s   | $\nu_{\text{CC}}, \nu_{\text{s,SO}_2}, \nu_{\text{a,CF}_3}$    |
|                  | 1195s  | 1199m | 1196s  |        | 1195s  | 1196w  | 1196s    | 1196s    | 1165    | 1196s   | $t_{\text{CH}_2}, \nu_{\text{a,CF}_3}$                         |
|                  | 1228sh | 1233s | 1227sh |        |        | sh     | 1227w    | 1227w    | 1226    | 1229sh  | $t_{\text{CH}_2}, \text{i.p.ring}, \nu_{\text{s,CF}_3}$        |
|                  |        |       |        | 1242m  | 1242m  | 1251m  | 1250w    | 1250w    | 1258    |         | $t_{\text{a,CH}_2}, \nu_{\text{a,SO}_3}$                       |
|                  |        |       |        | 1280m  | 1280m  | 1299m  | 1309w    | 1300w    | 1272    |         | $t_{\text{a,CH}_2}, t_{\text{s,CH}_2}, \nu_{\text{a,SO}_3}$    |
|                  |        | 1337s | 1337sh |        |        | sh     | 1334sh   | 1334sh   |         | 1331sh  | $\omega_{\text{CH}_2}, \nu_{\text{a,SO}_2}$                    |
|                  | 1353s  |       | 1352s  | 1342s  | 1343s  | 1350m  | 1353s    | 1353s    |         | 1351s   | $\omega_{\text{a,CH}_2}, \nu_{\text{a,SO}_2}$                  |
| 1374s            | 1375m  |       |        |        |        |        |          |          |         |         | $\omega_{\text{s,CH}_2}$                                       |
|                  |        | 1426s | 1426s  |        |        | 1426s  | 1427w    | 1427m    |         |         | $\delta_{\text{CH}_2}$                                         |
| 1443s            | 1444m  |       | 1443sh | 1454m  | 1454w  | 1453w  | 1437w    | sh       |         | 1453m   | $\delta_{\text{a,CH}_2}, \text{ring}$                          |
|                  | 1474m  |       | 1474m  | 1467m  | 1467m  | 1469w  | 1473w    | 1472w    |         | 1470m   | $\delta_{\text{a,CH}_2}, \text{ring}$                          |
| 2252s            | 2254s  | 2254s | 2254s  |        |        | 2251s  | 2253m    | 2253s    |         |         | $\nu_{\text{s,C=N}}$                                           |
| 2293s            | 2293w  |       |        | 2861sh |        | 2875s  | 2878s    | 2877s    |         |         | $\nu_{\text{s,CH}_2}$                                          |
|                  |        |       |        | 2889s  | 2890s  | 2899s  | 2907s    | 2905s    |         |         | $\nu_{\text{a,CH}_2}$                                          |
| 2942m            | 2944w  | 2952s | 2952s  |        |        | 2943sh | 2945sh   | 2946sh   |         |         | $\nu_{\text{s,CH}_2}$                                          |
| 3001m            | 3004w  | 2989s | 2989s  |        |        | 2975sh | 2980sh   | 2980sh   |         |         | $\nu_{\text{a,CH}_2}$                                          |

©Notation for relative intensity: w (weak), m (medium), s (strong), and sh (shoulder). ‡Notation for modes: stretching ( $\nu$ ), bending ( $\delta$ ), wagging ( $\omega$ ), twisting (t), and rocking ( $\rho$ ) modes. s, symmetric mode. a, asymmetric mode. i.p., in-plane. o.p., out-of-plane.

**Table S2.** Chemicals/ paste used for synthesis/ DSSC fabrication.

| Chemicals/ Paste                                                 | Purity (%) | Make                     |
|------------------------------------------------------------------|------------|--------------------------|
| Acetonitrile (ACN)                                               | 99.9       | Fisher Scientific, USA   |
| Tetrahydrofuran                                                  | 99.8       | VWR, USA                 |
| Absolute Ethanol                                                 | 99.5       | Fisher Scientific, USA   |
| Poly(ethylene oxide)                                             | 99         | Sigma-Aldrich, Inc., USA |
| Succinonitrile                                                   | 99         | Sigma-Aldrich, Inc., USA |
| LiCF <sub>3</sub> SO <sub>3</sub>                                | 96         | Sigma-Aldrich, Inc., USA |
| Titanium(IV) chloride                                            | 99.9       | Sigma-Aldrich, Inc., USA |
| Chenodeoxycholic acid                                            | 96         | Sigma-Aldrich, Inc., USA |
| Co(bpy) <sub>3</sub> (TFSI) <sub>2</sub>                         | -          | Dyename, Sweden          |
| Co(bpy) <sub>3</sub> (TFSI) <sub>3</sub>                         | -          | Dyename, Sweden          |
| Y123 dye                                                         | -          | Dyename, Sweden          |
| 18NRT paste (TiO <sub>2</sub> particle size 18 nm)               | -          | Dyesol, Australia        |
| Ti-Nanoxide R/SP paste (TiO <sub>2</sub> particle size > 100 nm) | -          | Solaronix, Switzerland   |
| Meltonix 1170-25 μm film                                         | -          | Solaronix, Switzerland   |

**Table S3.** Composition of liquid and solid redox mediators: ACNE, SNE, Blend 1E, Blend 2E, and PEOE.

| Electrolyte | x<br>(weight fraction) | EO/Li <sup>+</sup> | Poly(ethylene oxide) (g) | Acetonitrile/<br>Succinonitrile (g) | LiCF <sub>3</sub> SO <sub>3</sub> (g) | Co(bpy) <sub>3</sub> (TFSI) <sub>2</sub> (g) | Co(bpy) <sub>3</sub> (TFSI) <sub>3</sub> (g) |
|-------------|------------------------|--------------------|--------------------------|-------------------------------------|---------------------------------------|----------------------------------------------|----------------------------------------------|
| ACNE        | -                      | -                  | -                        | 0.4347                              | 0.0090                                | 0.1504                                       | 0.0454                                       |
| SNE         | 0                      | -                  | -                        | 0.5500                              | 0.0090                                | 0.1504                                       | 0.0454                                       |
| Blend 1E    | 0.5                    | 108.4              | 0.2750                   | 0.2750                              | 0.0090                                | 0.1504                                       | 0.0454                                       |
| Blend 2E    | 0.5                    | 216.8              | 0.5500                   | 0.5500                              | 0.0090                                | 0.1504                                       | 0.0454                                       |
| PEOE        | 1                      | 216.8              | 0.5500                   | -                                   | 0.0090                                | 0.1504                                       | 0.0454                                       |
